# Supplementary material for: Okra Micro-Cellulose Crystal (MCC) and Micro-Clay Composites for the Remediation of Copper, Nickel, and Dye (Basic Yellow II) from Wastewater
Source: MDPI journal article supplement (doi:10.3390/reactions4030021), 2023-07-04
Supplement: s1 [file s1]

Archive with 1 entries (1 files):
- reactions-2147611-supplementary.pdf
